# Supplementary material for: Modeling of laser-pulse induced small water cluster-(H2O)N (N = 1–10) decomposition on suitable metal cluster catalysts
Source: Royal Society of Chemistry journal article supplement (doi:10.1039/d2cp02387c), 2022-01-01
Supplement: d2cp02387c1.pdf [file d2cp02387c1.pdf]

# 1 Supporting Information of Modeling of 2 laser-pulse induced small water clusters- 3 (H<sub>2</sub>O)<sub>N</sub> (N=1-10) decomposition on suitable 4 metal cluster catalysts

5 Xiaojuan Li,<sup>1</sup> Xinlu Cheng<sup>2</sup> and Hong Zhang,<sup>1,2,\*</sup>

6 <sup>1</sup>College of Physics, Sichuan University, Chengdu 610065, China

7 <sup>2</sup>Key Laboratory of High Energy Density Physics and Technology of Ministry of Education,  
8 Sichuan University, Chengdu 610065, China

9 \*[hongzhang@scu.edu.cn](mailto:hongzhang@scu.edu.cn)

10

## 11 Laser Setting

12 People usually utilize intensity to describe the strength of laser field rather than the electric-field  
13 amplitude. The relationship between instantaneous electric field ( $I(t)$ ) and amplitude( $E(t)$ ) in  
14 atomic units can be described as:

$$I(t) = \frac{c}{8\pi} E^2(t) \quad (1)$$

15 To describe the laser intensity in W/cm<sup>2</sup>, a series of conversions should be performed. The  
16 dimensions of intensities are [W]/(L<sup>2</sup>T), where [W] are the dimensions of energy. The relevant  
17 conversion factors are as follows:

$$\text{Hartree}/(a_0^2 \text{atomic time}) = 6.364086 \times 10^{15} \text{ W/cm}^2 \quad (2)$$

$$\text{eV}/(\text{\AA}^2 (\hbar/\text{eV})) = 2.4341348 \times 10^{12} \text{ W/cm}^2 \quad (3)$$

$$I_0 = 3.51 \times 10^{16} \text{ W/cm}^2 (E_0^2) \text{ (a.u.)} \quad (4)$$

$$1E_0(\text{a.u.}) = 1 \text{ Hartree/bohr/e} = 51.423 \text{ (V/\AA)} \quad (5)$$

18 According to these equations, we can get the laser amplitudes and their intensities we used in this  
19 paper.

20

Table S1 Amplitude & intensity of the applied lasers

|      |      |      |      |      |      |      |      |                                 |
|------|------|------|------|------|------|------|------|---------------------------------|
| 2.5  | 3.0  | 4.5  | 5    | 6    | 7    | 7.5  | 8    | V/\AA                           |
| 0.83 | 1.19 | 2.69 | 3.32 | 4.78 | 6.50 | 7.47 | 8.49 | $\times 10^{14} \text{ W/cm}^2$ |

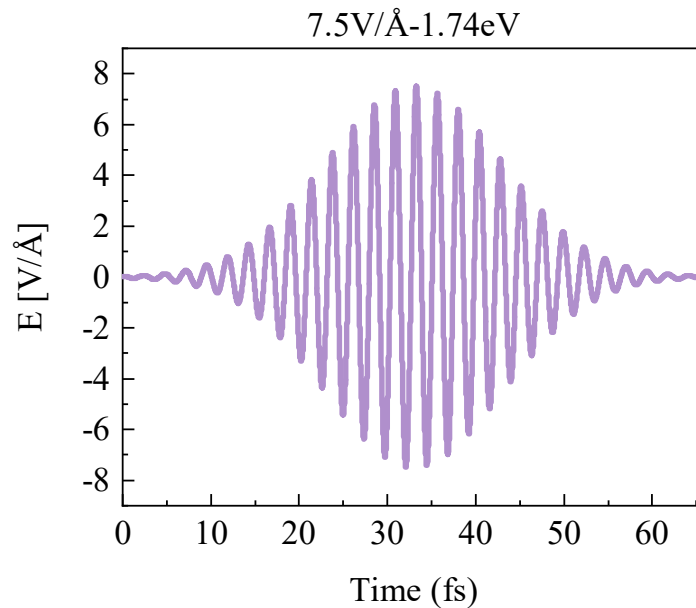

21

22 Figure S 1 Waveform of the incident laser pulse (7.5V/ Å-1.74eV-66fs).

23 The laser field reaches the maximum amplitude  $E_{\text{max}} = 7.5 \text{ V/Å}$  at the time  $t_0 = 33 \text{ fs}$ ,  
 24 corresponding to a laser intensity of  $\sim 7.47 \times 10^{14} \text{ W/cm}^2$ .

## 25 **Criteria for OH bond breakage**

26 According to the report[1], the cleavage of an OH bond in a water molecule requires the  
 27 adsorption of 100 kcal/mol of photon energy, which is about 4.86 eV. At present, the critical bond  
 28 lengths for OH breakage in water molecules to determine the decomposition of water molecules  
 29 are not uniform. For example, there are different published results as 2.00 Å[2], 2.84 Å[3], >3.00  
 30 Å[4, 5] and so on. In this paper, by calculating the photolysis of  $(\text{H}_2\text{O})_N$ , ( $N=1-10$ ) water clusters  
 31 under the condition of 7.5 V/Å-1.74 eV-66 fs pulsed laser, recording the final state ELF image of  
 32 the water molecule dissociation and being marked with the structural images of the bond length  
 33 shown in Figure S2, the maximum unbroken bond and the minimum broken bond of the OH bond  
 34 length in each water cluster are summarized in the Table S1.

35 We regard the OH bonds that still have charge localization between OHs in the final ELF  
 36 diagram as intact OH bonds, and the OH bonds that have no charge localization around the OH  
 37 bonds as broken bonds. As can be seen from Figure S2, under the 7.5 V/Å-1.74 eV-66 fs laser, for  
 38 single-molecule water  $(\text{H}_2\text{O})_1$ , the two OH bonds are all broken; the water molecules are

39 completely decomposed; and the nearest distance between O and H atoms of original water  
40 molecule is 3.64 Å. For the dimer water cluster (H<sub>2</sub>O)<sub>2</sub>, only two OHs of one water molecule are  
41 broken; and the other water molecule remains intact, that is, 50% of the OH bonds are broken;  
42 Among them, the largest length of the unbroken OH bond could be 1.048 Å, and the nearest  
43 distance broken O and H atom of an original OH bond could be 3.261 Å. Similarly, for the  
44 maximum unbroken bond length, we can get 1.368 Å for the trimeric water cluster (H<sub>2</sub>O)<sub>3</sub>, 1.658  
45 Å for the tetrameric water cluster (H<sub>2</sub>O)<sub>4</sub>, 1.783 Å for the pentameric water cluster (H<sub>2</sub>O)<sub>5</sub>, 1.761  
46 Å for the caged hexameric water cluster (H<sub>2</sub>O)<sub>6-c</sub>, 1.752 Å for the prismatic hexameric water  
47 cluster (H<sub>2</sub>O)<sub>6-p</sub>, 1.761 Å for the heptameric water cluster (H<sub>2</sub>O)<sub>7</sub>, 1.62 Å for the octameric water  
48 cluster (H<sub>2</sub>O)<sub>8</sub>, 1.764 Å for the nonameric water cluster (H<sub>2</sub>O)<sub>9</sub>, and 1.453 Å for the decamer water  
49 cluster (H<sub>2</sub>O)<sub>10</sub>. For the broken bonds, the nearest distance between O and H atoms of original  
50 bond, we can get 3.640 Å, 3.261 Å, 3.557 Å, 3.261 Å, 1.847 Å, 1.819 Å, 1.834 Å, 1.929 Å and  
51 1.906 Å as Minimum Broken Bond respectively. In short, among all the 11 water clusters, the  
52 minimum distance between the broken bonds is 1.819 Å, and the largest unbroken bond length is  
53 1.783 Å. In conclusion, 1.8 Å could be set as the breaking critical bond length of the OH bond in  
54 the water molecule.

55 Table S 1 The length of the OH bond in the final state of the system when the water cluster

56 (H<sub>2</sub>O)<sub>N</sub>, (N=1-10) photolysis occurs

| (H <sub>2</sub> O) <sub>N</sub>   | Maximum Unbroken OH Bond | Minimum Broken Bond |
|-----------------------------------|--------------------------|---------------------|
| (H <sub>2</sub> O) <sub>1</sub>   | -                        | 3.640 Å             |
| (H <sub>2</sub> O) <sub>2</sub>   | 1.048 Å                  | 3.261 Å             |
| (H <sub>2</sub> O) <sub>3</sub>   | 1.368 Å                  | 3.557 Å             |
| (H <sub>2</sub> O) <sub>4</sub>   | 1.658 Å                  | -                   |
| (H <sub>2</sub> O) <sub>5</sub>   | 1.783 Å                  | -                   |
| (H <sub>2</sub> O) <sub>6-c</sub> | 1.761 Å                  | 3.261 Å             |
| (H <sub>2</sub> O) <sub>6-p</sub> | 1.752 Å                  | 1.847 Å             |
| (H <sub>2</sub> O) <sub>7</sub>   | 1.761 Å                  | 1.819 Å             |
| (H <sub>2</sub> O) <sub>8</sub>   | 1.620 Å                  | 1.834 Å             |
| (H <sub>2</sub> O) <sub>9</sub>   | 1.764 Å                  | 1.929 Å             |
| (H <sub>2</sub> O) <sub>10</sub>  | 1.453 Å                  | 1.906 Å             |



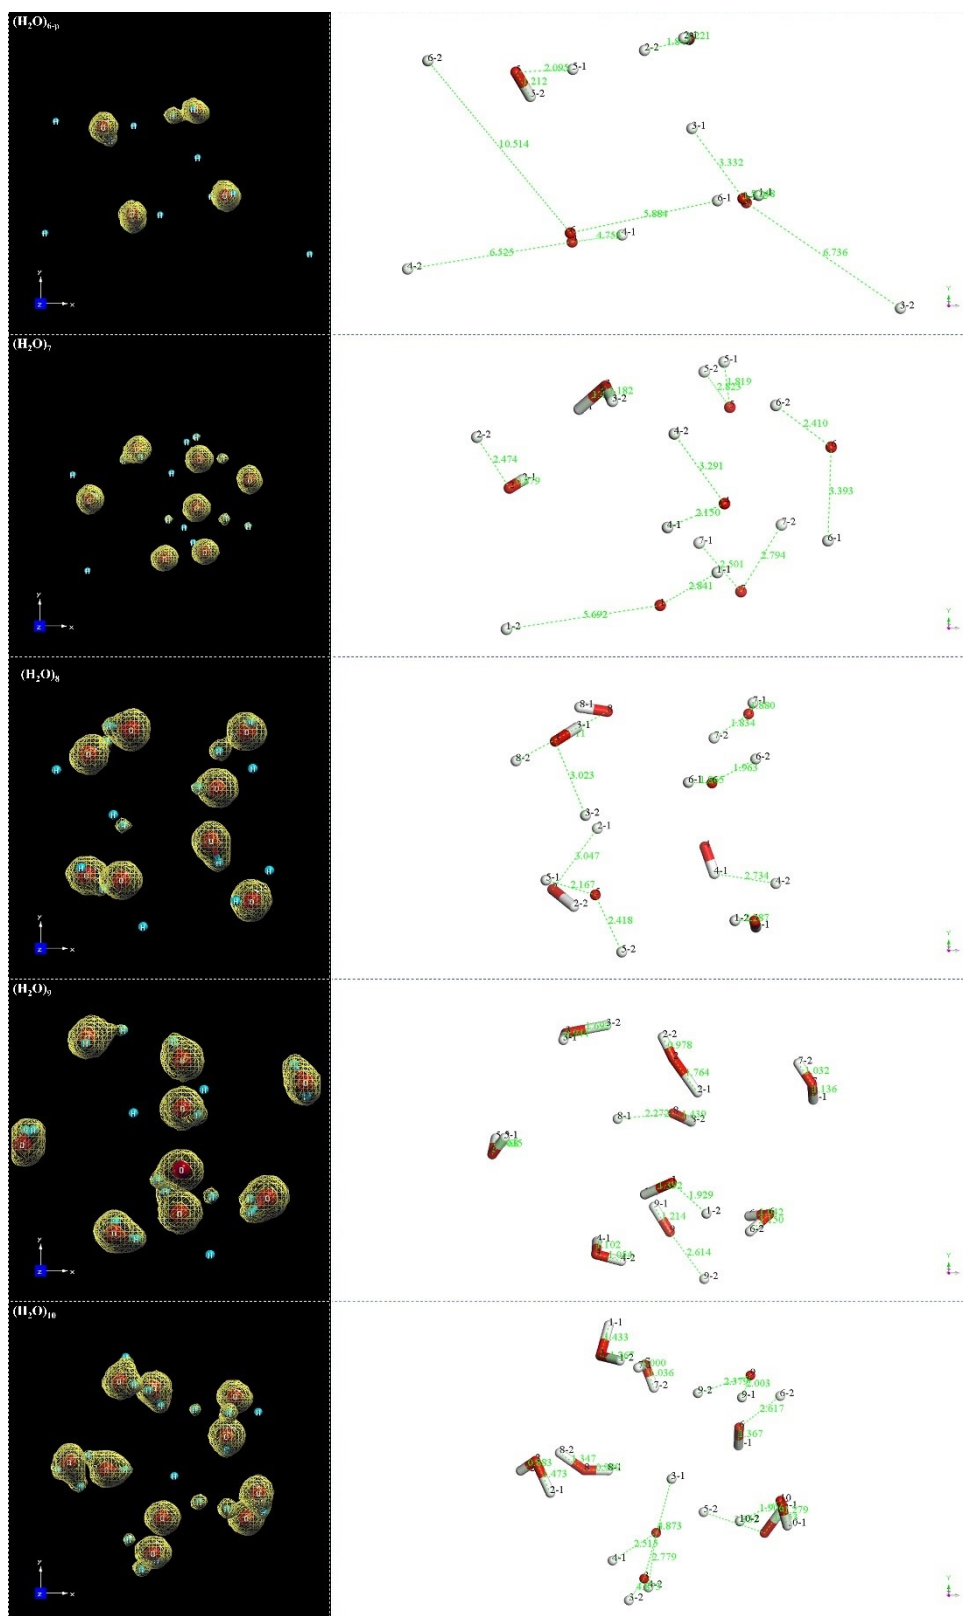

59

60 Figure S 2 Final ELF and structure diagram of Water cluster  $(\text{H}_2\text{O})_N$  ( $N=1-10$ ) under laser

61

(laser:  $7.5 \text{ V/\AA}$ - $1.74 \text{ eV}$ - $66 \text{ fs}$ )

62

63

## 64 Threshold identification

65 S3-1:  $(\text{H}_2\text{O})_1$ -7V/Å -1.74 eV-66 fs

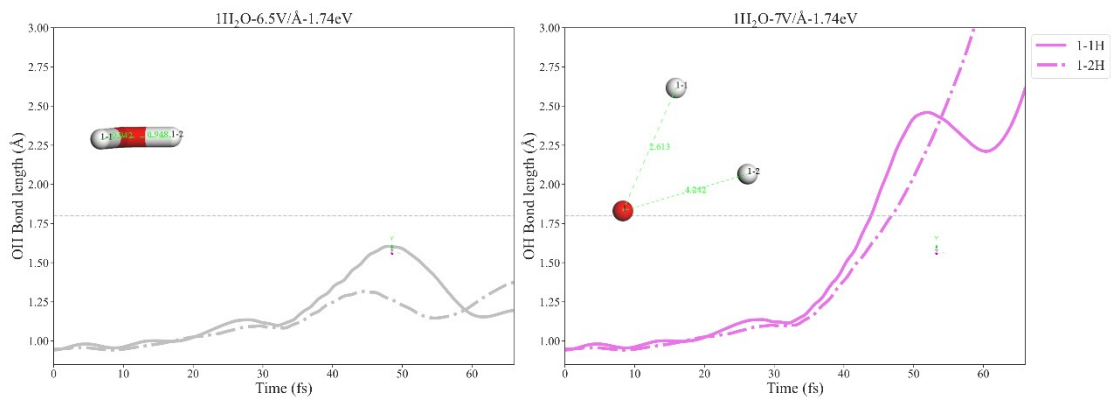

68 S3-2:  $(\text{H}_2\text{O})_2$ -7 V/Å-1.74 eV

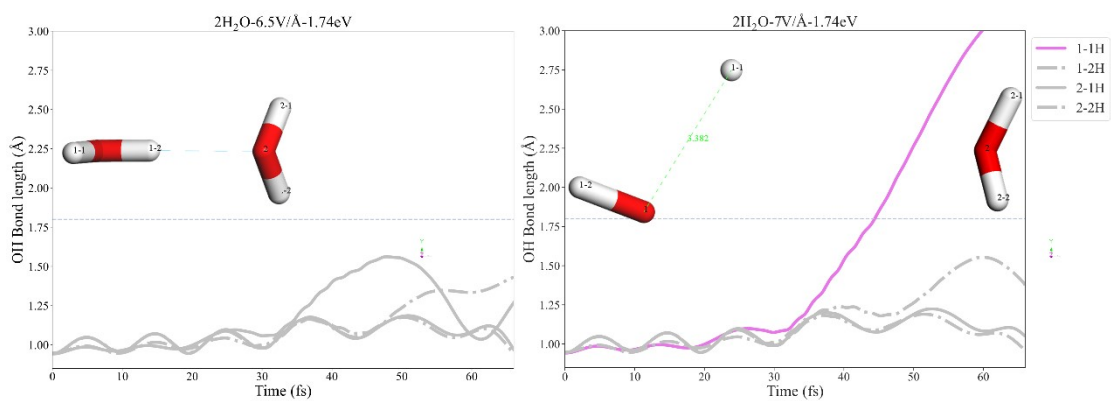

71 S3-3:  $(\text{H}_2\text{O})_3$ -7 V/Å-1.74 eV

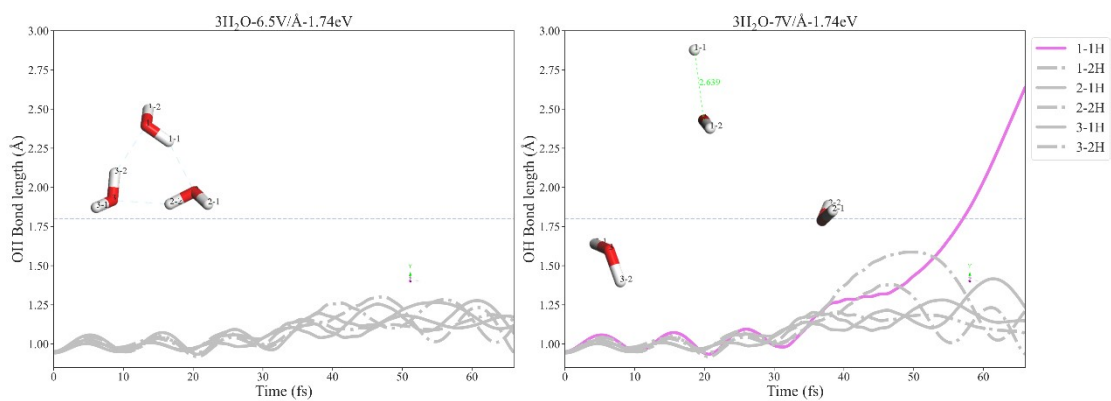

76

S3-4: (H<sub>2</sub>O)<sub>4</sub>-8 V/Å-1.74 eV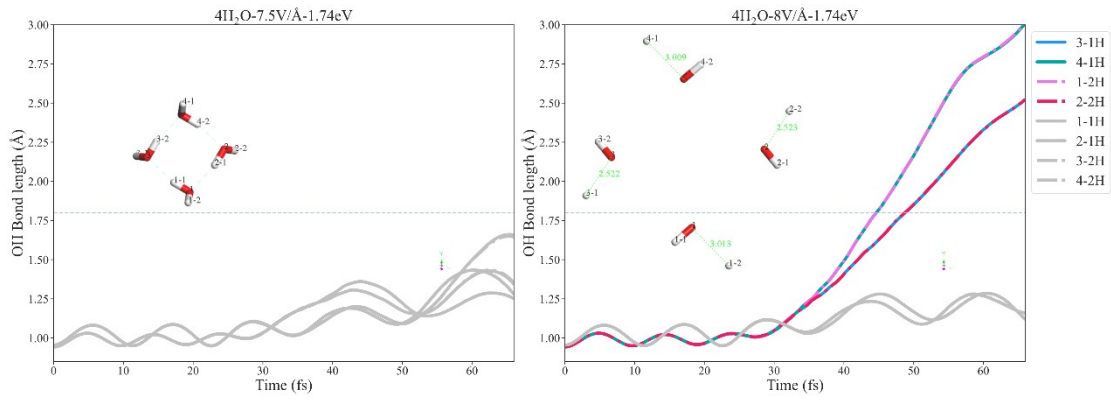

77

78

79

S3-5: (H<sub>2</sub>O)<sub>5</sub>-8 V/Å-1.74 eV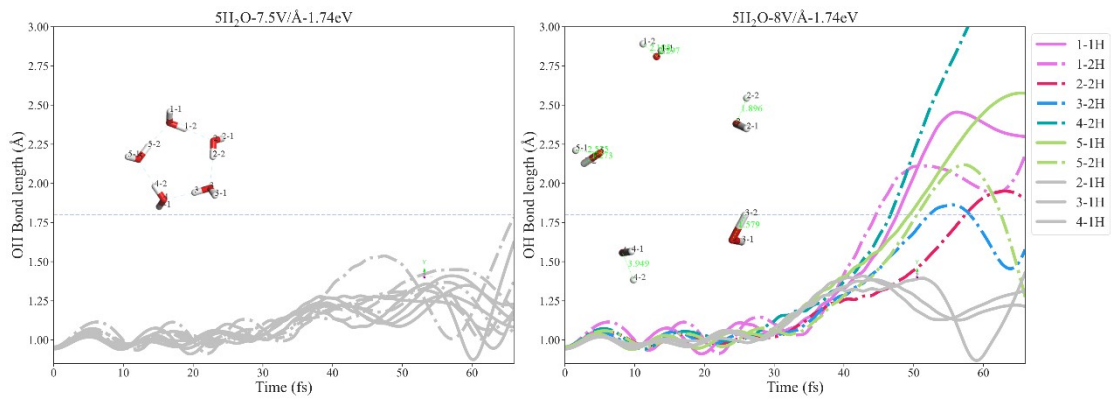

80

81

82

S3-6: (H<sub>2</sub>O)<sub>6-p</sub>-4.5 V/Å-1.74 eV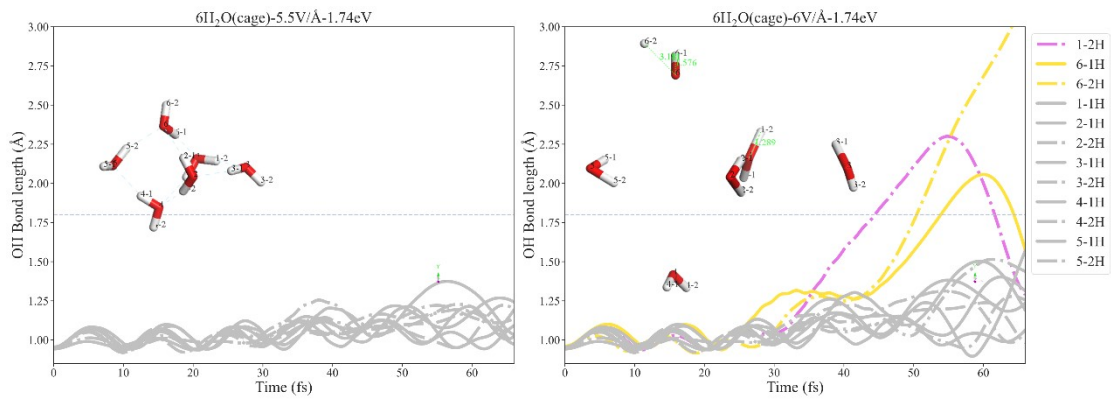

83

84

85

86

87

88

89

S3-7: (H<sub>2</sub>O)<sub>6</sub>-c-6 V/Å-1.74 eV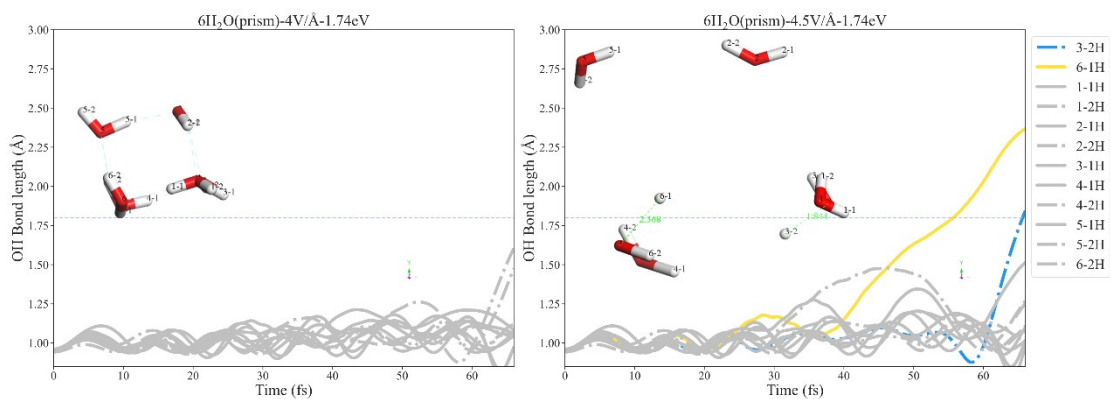

90

91

92

S3-8: (H<sub>2</sub>O)<sub>7</sub>-6 V/Å-1.74 eV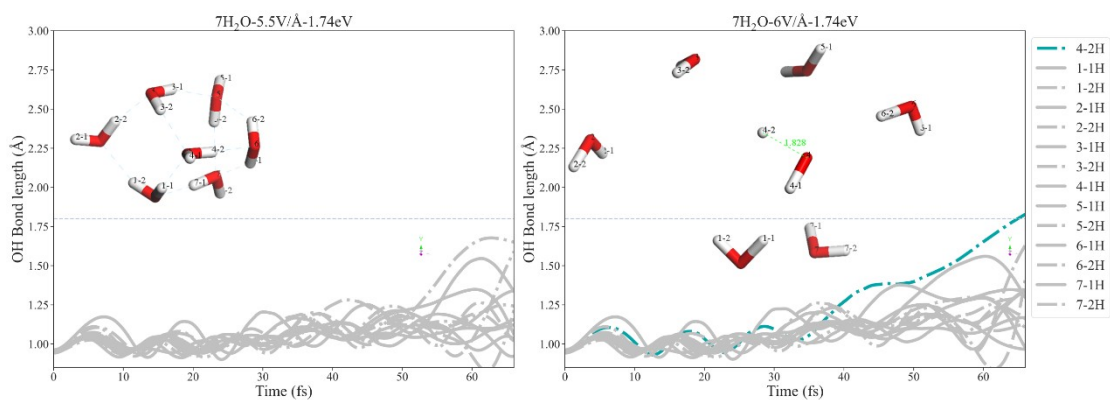

93

94

95

S3-9: (H<sub>2</sub>O)<sub>8</sub>-6 V/Å-1.74 eV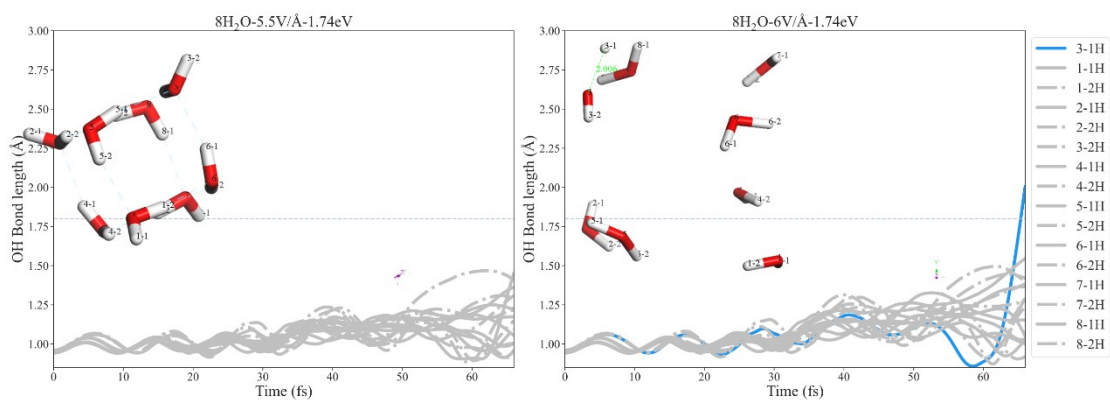

96

97

98

99

100

101



102

S3-10:  $(\text{H}_2\text{O})_1$ - $6.5\text{V}/\text{\AA}$  - $1.74\text{ eV}$ - $200\text{ f}$ 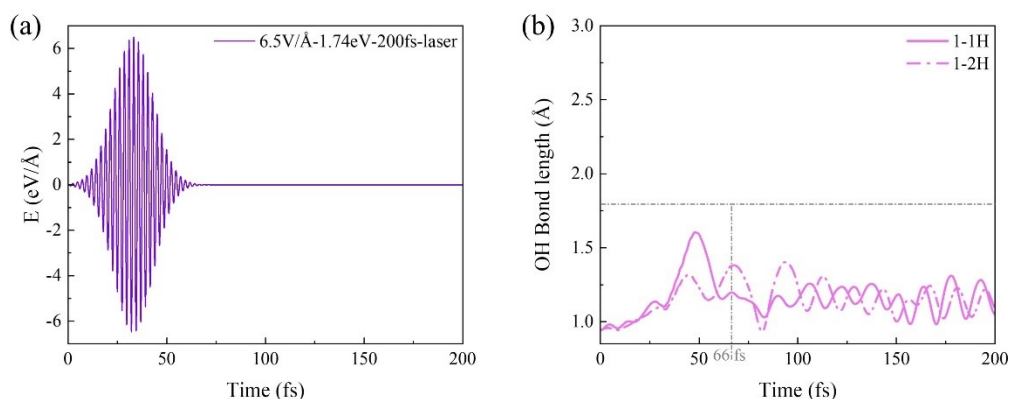

103

104 Figure S 3 Time evolution of the lengths of OH bonds of water clusters, (S2-1)  $\text{H}_2\text{O}$  (S2-2)  $(\text{H}_2\text{O})_2$  (S2-  
 105 3)  $(\text{H}_2\text{O})_3$  (S2-4)  $(\text{H}_2\text{O})_4$  (S2-5)  $(\text{H}_2\text{O})_5$  (S2-6)  $(\text{H}_2\text{O})_{6-p}$  (S2-7)  $(\text{H}_2\text{O})_{6-c}$  (S2-8)  $(\text{H}_2\text{O})_7$  (S2-9)  $(\text{H}_2\text{O})_8$ , in  
 106 laser-induced photodissociation processes, where the intensities of  $1.74\text{ eV}$ - $66\text{ fs}$ -lasers are at their  
 107 threshold (right) and  $0.5\text{ V}/\text{\AA}$  lower than their threshold; S2-10 Time evolution of the lengths of OH  
 108 bonds of monomer water under the laser  $6.5\text{V}/\text{\AA}$  - $1.74\text{ eV}$ - $66\text{ fs}$  propagating for  $200\text{ fs}$ . The grey  
 109 horizontal dotted line indicates the critical value. The insets are the initial snapshots (in the left panel)  
 110 and final snapshots (in the right panel) of the dissociation process with atoms stamped.

## 111 Hydrogen Dissociation Dynamics from $(\text{H}_2\text{O})_4$ Cluster

### 112 HOMO and LUMO orbitals of the $(\text{H}_2\text{O})_4$ cluster before 113 and after laser irradiation

114 Finally, to further examine the polarization and subsequent dissociation dynamics of the O–H  
 115 bonds in the  $(\text{H}_2\text{O})_4$  cluster, the Kohn-Sham orbitals were computed as the wave function of time  
 116 in Figure S4. We used the following visualization scheme with iso-value being  $0.05$  in Figure S4,  
 117 and its color (red and green) represents its phase (positive and negative). At  $T = 0\text{ fs}$ , the highest  
 118 occupied molecular orbital (HOMO) is occupied by a pair of lone pairs since the electron  
 119 distribution is centered around the O atom but not on the O-H line indicating that the electrons of  
 120 the HOMO orbital are not involved in the O-H bond formation. The Lowest Unoccupied  
 121 Molecular Orbital (LUMO) locates the antibonding position of O-H, as the electron density is  
 122 mainly concentrated in the connection of O and H atoms, but not between them. Over time, the

123 electrons distribution of HOMO and LUMO remains similar to the initial situation until the water  
124 molecule breaks. The distribution of positive charge in HOMO and LUMO is concentrated on the  
125 free H atoms.

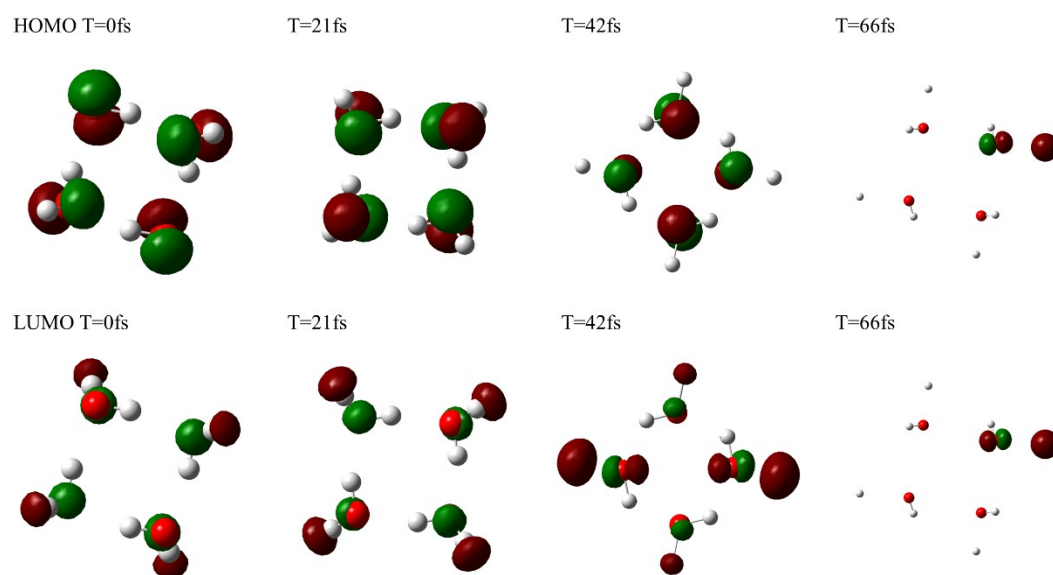

126  
127 Figure S 4 Time evolution of charge distribution in HOMO (up) and LUMO (down) orbitals of  
128  $(\text{H}_2\text{O})_4$  cluster in a laser-induced photodissociation process, where the intensities of 1.74 eV-66 fs-  
129 lasers are  $8\text{V}/\text{\AA}$ .

130

### 131 Compound structures with Ag<sub>6</sub> and (H<sub>2</sub>O)<sub>4</sub>

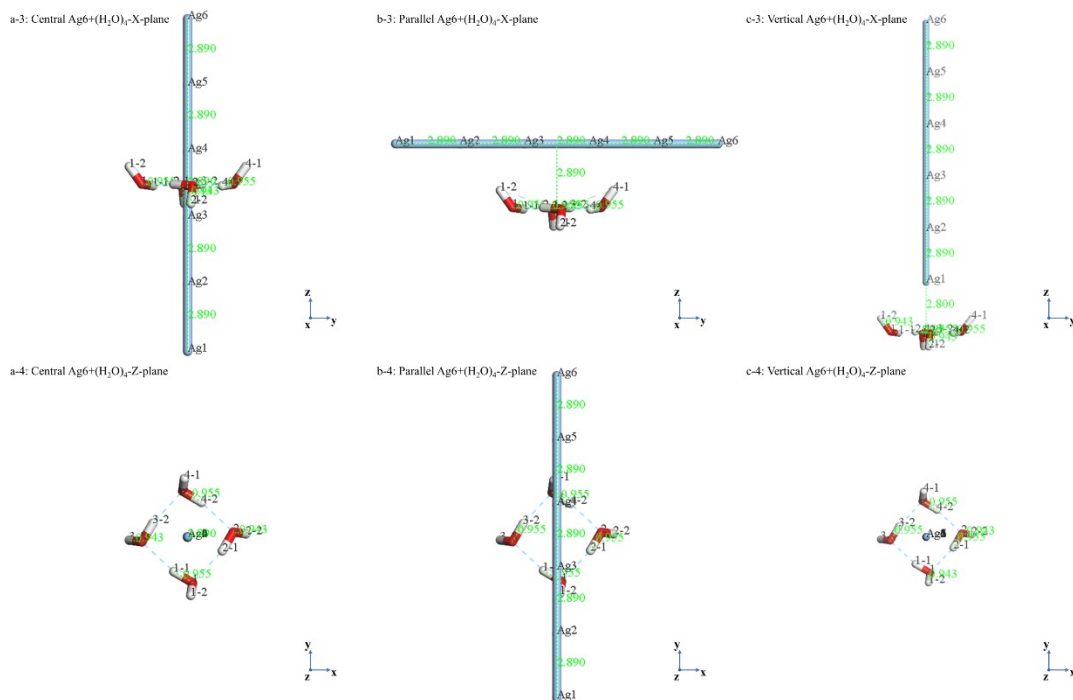

132

133 Figure S 5 The compound structures of (a) central (b)parallel and (vertical) Ag<sub>6</sub> chain and (H<sub>2</sub>O)<sub>4</sub>

134

cluster.

### 135 Adsorption Spectrum

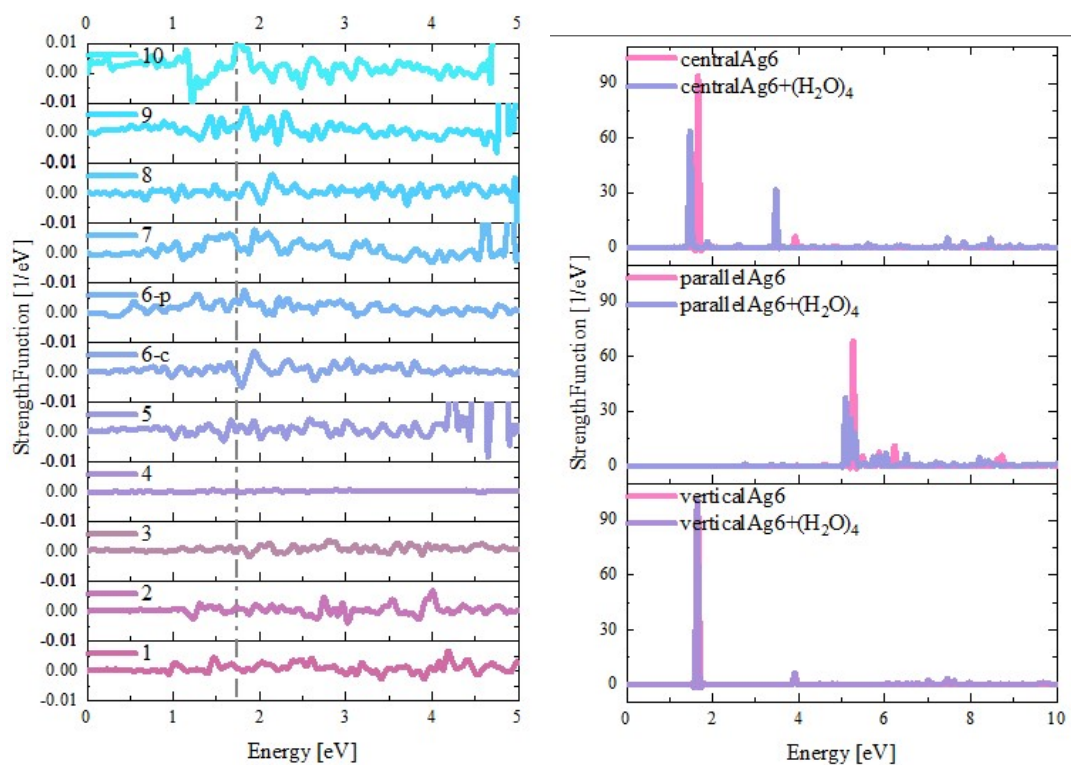

136

137 Figure S 6 Optical absorption spectrum of the pure water clusters (left) and compound structures of

138  $(\text{H}_2\text{O})_4$  cluster with  $\text{Ag}_6$  chain rectangular monolayer phosphorene nanostructures to an impulse

139 excitation polarized in the X-axis(a) and Y-axis(b) directions.

140 [1] N.J. Turro, Modern Molecular Photochemistry, 1978).

141 [2] L. Yan, J. Xu, F. Wang, S. Meng, Plasmon-Induced Ultrafast Hydrogen Production in Liquid  
142 Water, Journal of Physical Chemistry Letters 9 (2018) 63-69.

143 [3] L. Yan, F. Wang, S. Meng, Quantum Mode Selectivity of Plasmon-Induced Water Splitting on  
144 Gold Nanoparticles, ACS Nano 10 (2016) 5452-5458.

145 [4] Y. Miyamoto, H. Zhang, X. Cheng, A. Rubio, Ab initio simulation of laser-induced water  
146 decomposition close to carbon nanotubes, Phys. Rev. B: Condens. Matter 99 (2019) 165424.

147 [5] Y. Miyamoto, H. Zhang, X. Cheng, A. Rubio, Modeling of laser-pulse induced water  
148 decomposition on two-dimensional materials by simulations based on time-dependent density  
149 functional theory, Physical Review B: Condensed Matter 96 (2017) 115451.

150

151
